# Supplementary material for: Heterojunction Hybrid Devices from Vapor Phase Grown MoS2
Source: PubMed Central journal article supplement — Sci Rep. 2014 Jun 26;4:5458. doi: 10.1038/srep05458 (PMC4074969; doi:10.1038/srep05458), 2014-06-26
Supplement: srep05458-s1.pdf [file srep05458-s1.pdf]

## Supplementary Information

### Heterojunction Hybrid Devices from Vapor Phase Grown MoS<sub>2</sub>

Chanyoung Yim<sup>1,2</sup>, Maria O'Brien<sup>1,2</sup>, Niall McEvoy<sup>2</sup>, Sarah Riazimehr<sup>3</sup>, Heiko Schäfer-Eberwein<sup>3</sup>, Andreas Bablich<sup>3</sup>, Ravinder Pawar<sup>4</sup>, Giuseppe Iannaccone<sup>4</sup>, Clive Downing<sup>2</sup>, Gianluca Fiori<sup>4</sup>, Max C. Lemme<sup>3</sup> and Georg S. Duesberg<sup>1,2,\*</sup>

<sup>1</sup>School of Chemistry, Trinity College Dublin, Dublin 2, Ireland

<sup>2</sup>Centre for Research on Adaptive Nanostructures and Nanodevices (CRANN) and Advanced Materials and BioEngineering Research (AMBER) Centre, Trinity College Dublin, Dublin 2, Ireland

<sup>3</sup>University of Siegen, Hölderlinstrasse 3, 57076 Siegen, Germany

<sup>4</sup>Dipartimento di Ingegneria dell'Informazione, Università di Pisa, Via G. Caruso 16, 56122 Pisa, Italy

\*Corresponding author: [duesberg@tcd.ie](mailto:duesberg@tcd.ie)

## **MoS<sub>2</sub> thickness measurements using spectroscopic ellipsometry (SE)**

Thickness measurements were conducted using an Alpha SE tool (J. A. Woollam Co., Inc.) operating in the wavelength range of 380 - 900 nm at an angle of incidence of 70 ° with a beam spot size of ~40 mm<sup>2</sup>. SE data were analyzed using CompleteEASE 4.72 (J. A. Woollam Co., Inc.). The SE system gathered values of psi ( $\Psi$ ) and delta ( $\Delta$ ) which represent the amplitude ratio ( $\Psi$ ) and phase difference ( $\Delta$ ) between p- and s-polarizations, respectively. The two parameters are related to the ratio  $\rho$ , defined by the equation of  $\rho = r_p/r_s = \tan(\Psi)\exp(i\Delta)$ , where  $r_p$  and  $r_s$  are the amplitude reflection coefficients for the p-polarized and s-polarized light, respectively.<sup>1</sup> A four-layer optical model which consists of a Si substrate, an interface layer between Si and SiO<sub>2</sub>, a SiO<sub>2</sub> layer and a MoS<sub>2</sub> layer was built to analyze the SE spectra, and a Tauc-Lorentz (T-L) oscillation model<sup>2</sup> was used to determine the thicknesses of the MoS<sub>2</sub> thin films.

### Additional Raman analysis: Scanning Raman map

Raman maps were acquired from the MoS<sub>2</sub> film (~12 nm thick) transferred onto SiO<sub>2</sub> at a power of 250  $\mu$ W by taking 100  $\times$  100 spectra over a 25  $\times$  25  $\mu$ m area (10, 000 discrete spectra). Each spectrum had an acquisition time of 0.2 s.

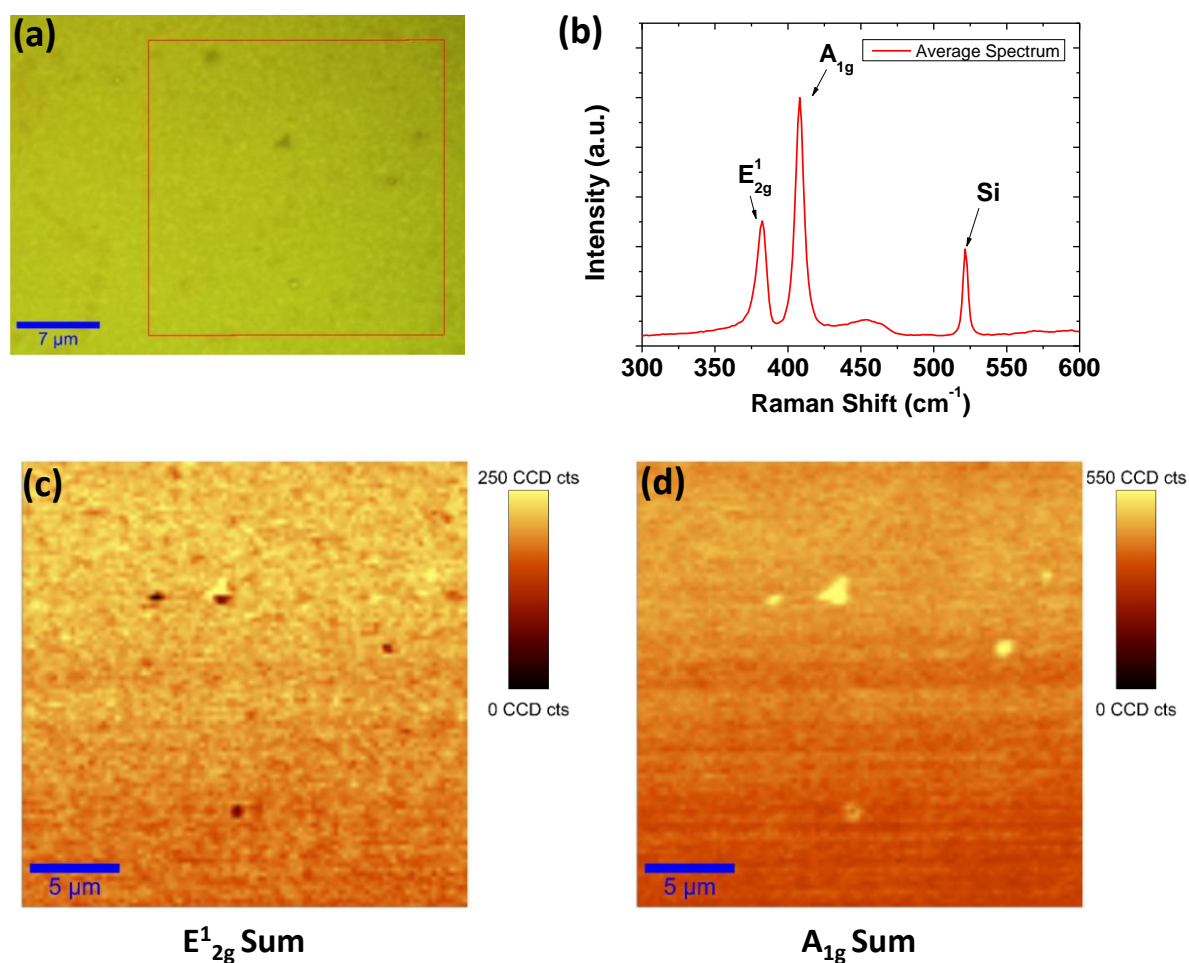

Figure S1. (a) Optical microscopy image of MoS<sub>2</sub> film transferred onto SiO<sub>2</sub>. The red box indicates the 25  $\times$  25  $\mu$ m area over which Raman spectra were acquired. (b) Raman spectrum obtained by averaging over 10,000 discrete spectra which comprised the Raman map. Raman maps showing the intensity of the (c) E<sub>2g</sub><sup>1</sup> and (d) A<sub>1g</sub> peaks.

## Selected area electron diffraction (SAED) patterns of the MoS<sub>2</sub> thin film

(a)

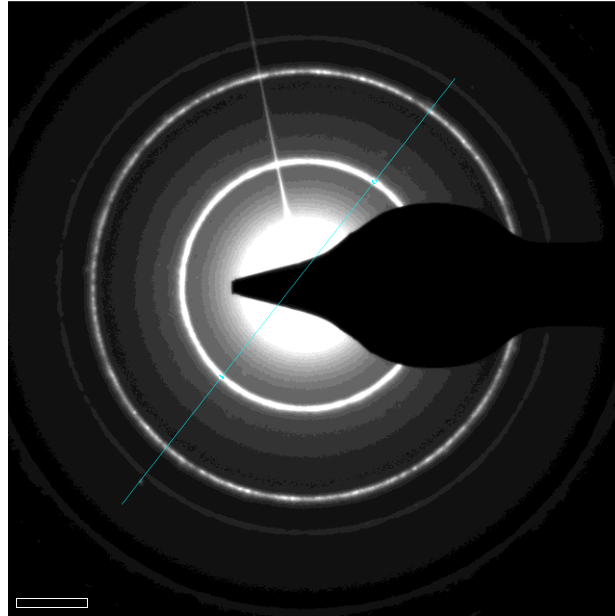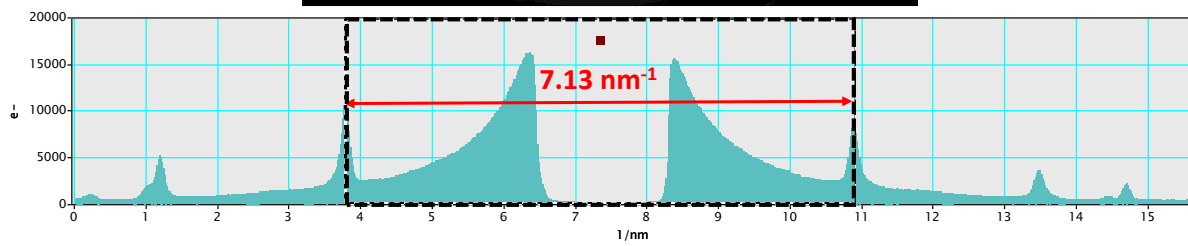

(b)

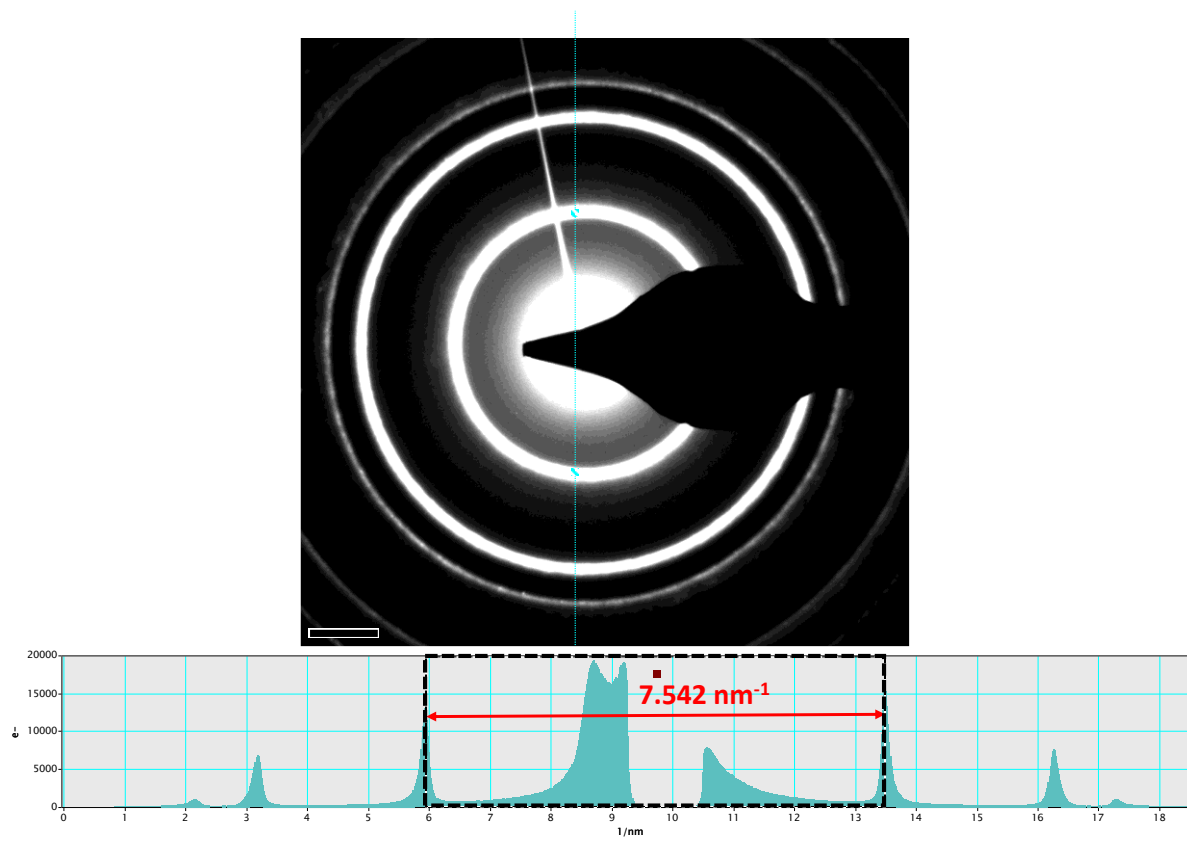

Figure S2. Representative electron diffraction patterns from different areas of the MoS<sub>2</sub> film revealing Mo-Mo lattice spacings of (a) 0.324 nm and (b) 0.306 nm, respectively.

## Device preparation

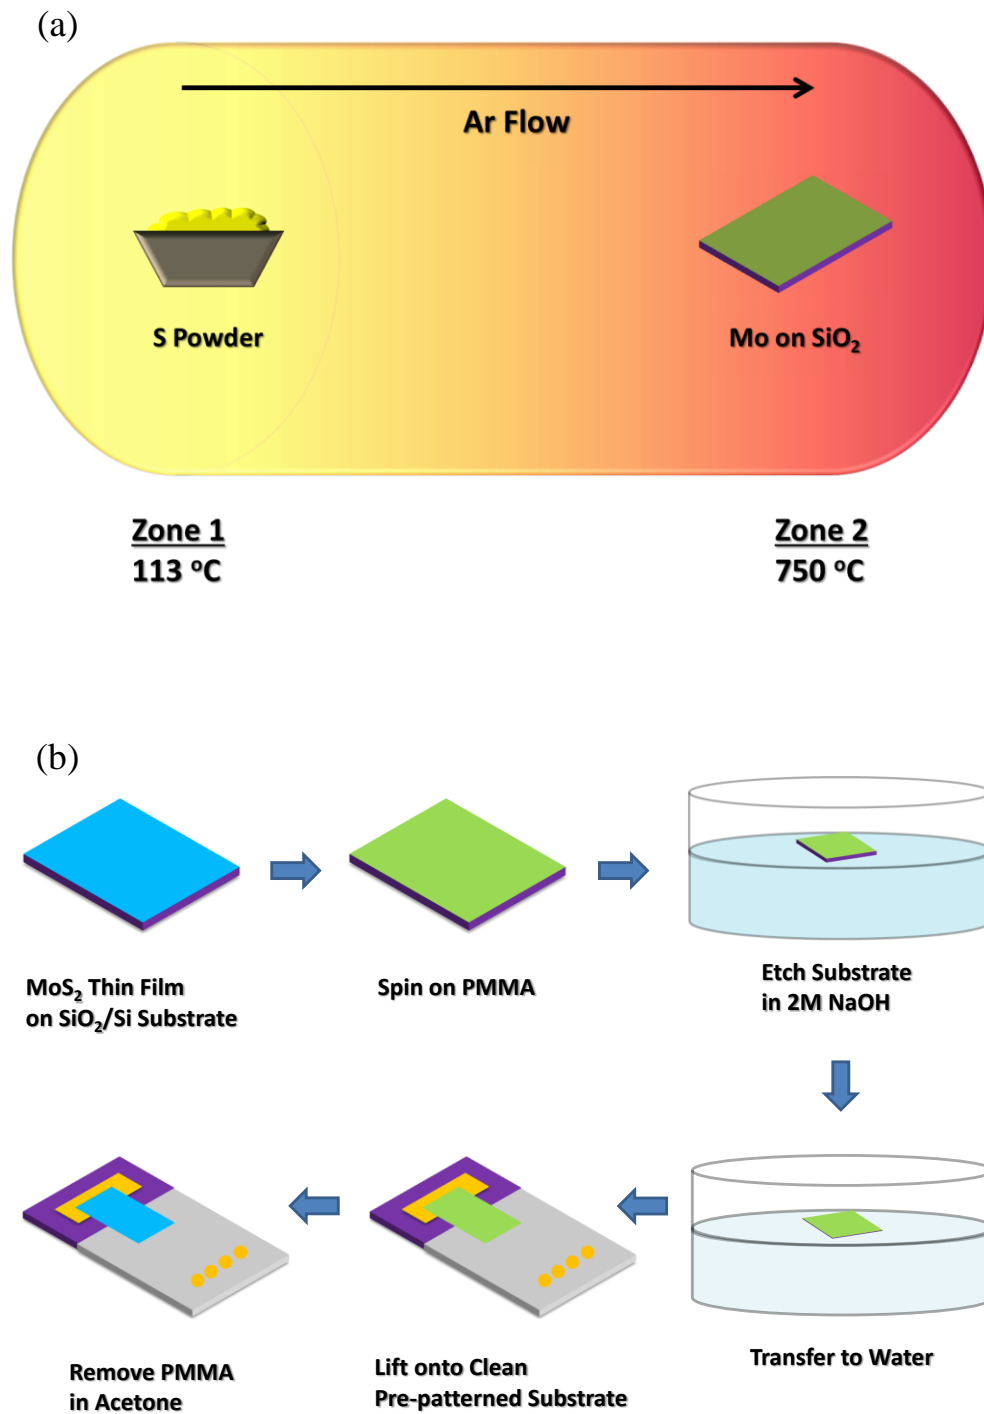

Figure S3. (a) Schematic diagram of the vapor phase sulfurization process. (b) Transfer process of as-grown MoS<sub>2</sub> thin films onto the pre-patterned substrate.

## Diode parameter extraction from the $J$ - $V$ measurements of the MoS<sub>2</sub>/p-Si diode

The forward  $J$ - $V$  characteristics of a diode in dark conditions can be expressed using the flowing diode equation,

$$J = J_S \left[ \exp \left( \frac{qV_D}{nk_B T} \right) - 1 \right], \quad (1)$$

where  $J$  is the current density of the diode,  $V_D$  is the voltage drop across the junction,  $J_S$  is the reverse saturation current density,  $n$  is the ideality factor,  $k_B$  is the Boltzmann constant,  $q$  is the elementary charge and  $T$  is the absolute temperature in Kelvin. When the effect of series resistance ( $R_S$ ), an additional secondary resistance component observed in the high forward bias region of practical diode devices, is taken into account, for  $V_D > 3k_B T/q$ , by replacing  $V_D$  with  $V - JAR_S$ , Eq (1) can be written as follows,

$$J = J_S \exp \left[ \frac{q(V - JAR_S)}{nk_B T} \right], \quad (2)$$

where  $V$  is the total voltage drop across the series combination of the junction and  $R_S$ , and  $A$  is the effective contact area of the diode. This can be modified in terms of  $V$  and  $J$  and rewritten as the following equation.

$$V = JAR_S + \frac{nk_B T}{q} \ln \left( \frac{J}{J_S} \right), \quad (3)$$

Differentiating Eq. (3) in terms of  $J$ , we obtain

$$\frac{dV}{dJ} = AR_S + \frac{nk_B T}{qJ}. \quad (4)$$

According to Eq (4),  $dV/dJ$  is linearly proportional to  $1/J$ . Thus, the ideality factor ( $n \geq 1$ ) of a diode, which represents how closely the diode follows ideal diode behavior and has a value of unity in the ideal case, and the series resistance, can be extracted by extrapolating the linear region of the plot of  $dV/dJ$  vs.  $1/J$ . The  $dV/dJ$  vs.  $1/J$  plot of the 12.52 nm device is shown in

Figure S4, giving a series resistance value of 7.3 k $\Omega$  from the y-axis intercept and an ideality factor value of 1.68 from the slope.

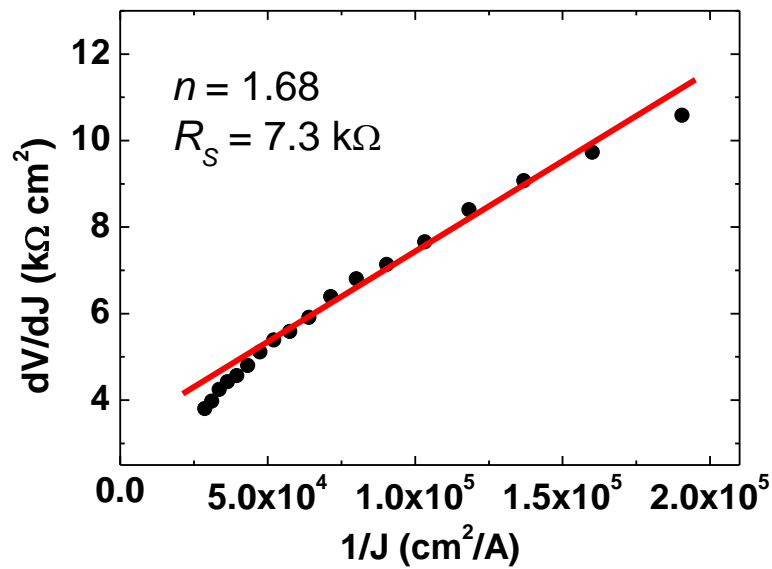

Figure S4. Plot of  $dV/dJ$  vs.  $1/J$  extracted from the  $J$ - $V$  data of the diode with 12.52 nm thick MoS<sub>2</sub>, giving a series resistance value of 7.3 k $\Omega$  and an ideality factor value of 1.68.



## Additional $J$ - $V$ plots of the MoS<sub>2</sub>/p-Si diode devices

(a)

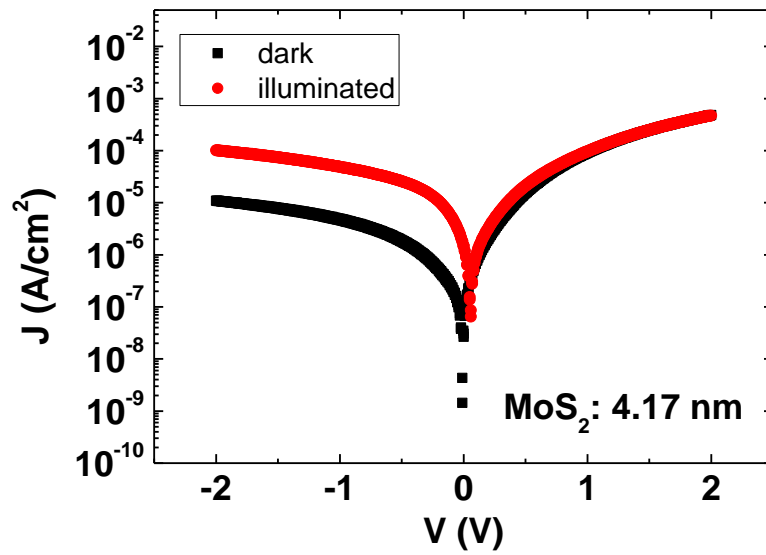

(b)

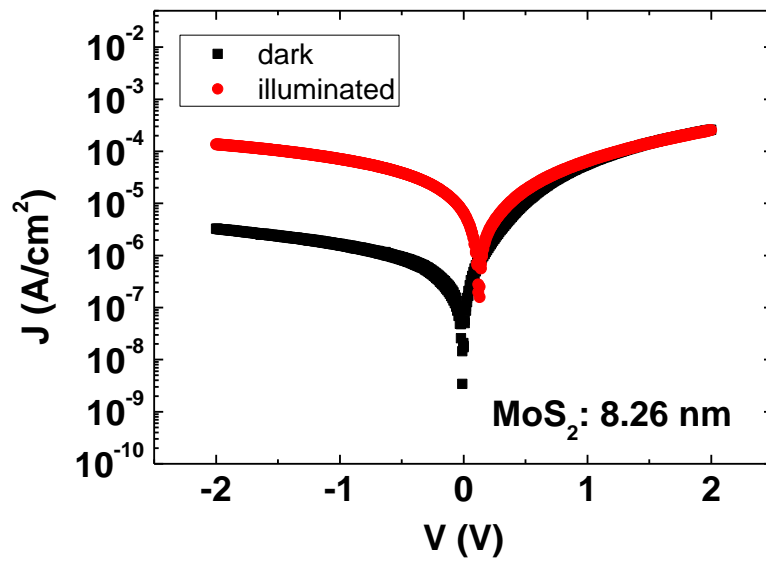

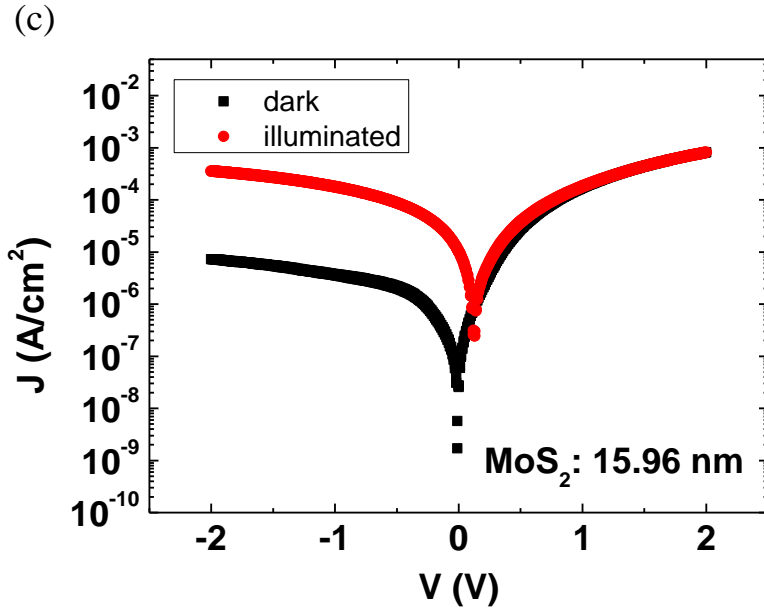

Figure S5. Semi-logarithmic  $J$ - $V$  plots of the MoS<sub>2</sub>/p-Si diode devices with MoS<sub>2</sub> film thickness of (a) 4.17 nm, (b) 8.26 nm, and (c) 15.96 nm in the dark and illumination (50 % of full intensity).

## Additional data for the spectral response measurements

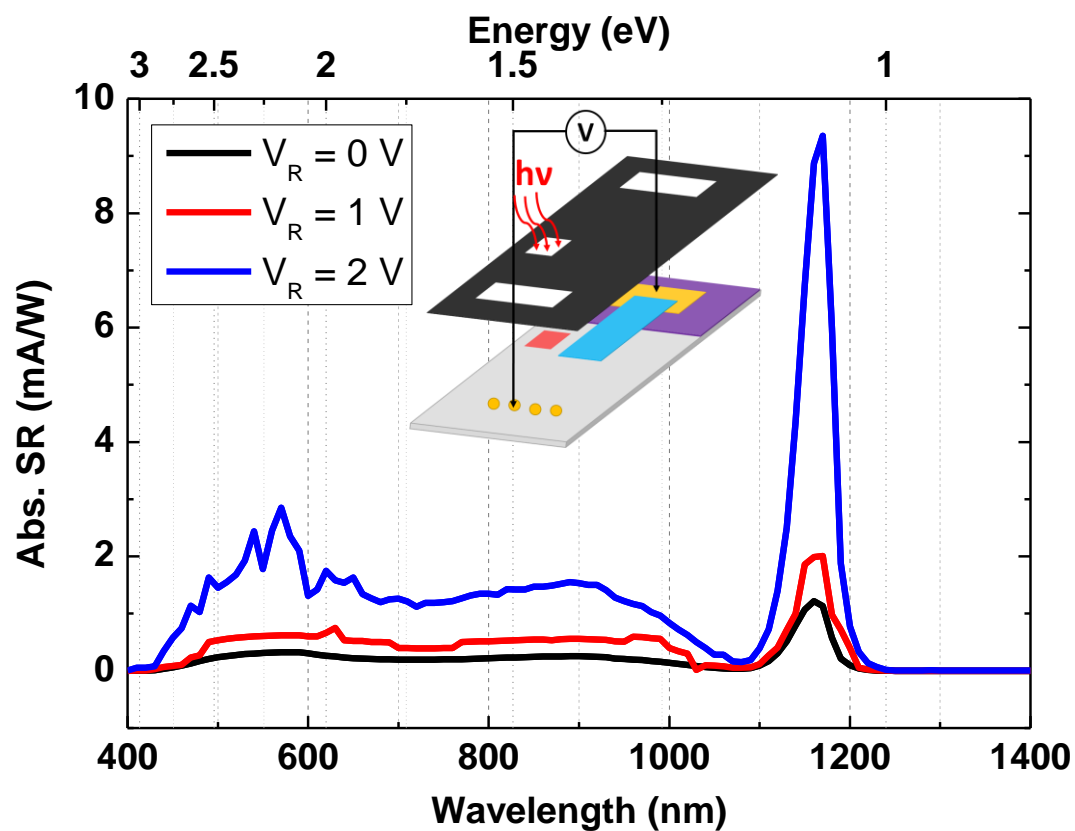

Figure S6. Absolute spectral response vs. wavelength (lower x-axis) and energy (upper x-axis) related to the diode device with an 8.26 nm thick MoS<sub>2</sub> film at zero bias and reverse bias (V<sub>R</sub>) of 1 and 2 V with the mask opening on p-Si. The inner picture is a schematic diagram of the n-type MoS<sub>2</sub>/p-Si heterojunction diode device with mask opening on p-Si.

## References

- 1 Fujiwara, H. *Spectroscopic ellipsometry : principles and applications*. 81-87 (John Wiley & Sons Ltd, 2007).
- 2 Jellison, G. E. & Modine, F. A. Parameterization of the optical functions of amorphous materials in the interband region. *Appl. Phys. Lett.* **69**, 371 (1996).
